# Supplementary material
Source: PubMed Central journal article supplement (PMC4148805)
Supplement: AEM.01133-14_zam999105528so1.pdf [file AEM.01133-14_zam999105528so1.pdf]

**Cellulolytic *Streptomyces* strains associated with herbivorous insects share a phylogenetically-linked capacity for the degradation of lignocellulose**

Adam J. Book\*<sup>1,2</sup>, Gina R. Lewin\*<sup>1,2</sup>, Bradon R. McDonald<sup>1,2</sup>, Taichi E. Takasuka<sup>1,3</sup>, Drew T. Doering<sup>1,2</sup>, Aaron S. Adams<sup>4</sup>, Joshua A. V. Blodgett<sup>5</sup>, Jon Clardy<sup>5</sup>, Kenneth F. Raffa<sup>4</sup>, Brian G. Fox<sup>1,3</sup>, and Cameron R. Currie<sup>1,2</sup>

**SUPPLEMENTAL MATERIAL**

Dataset S1 – TIGERFAM protein families used to generate phylogenetic tree in Figure 3  
 Dataset S2 – CAZy annotations for SACTE, SDPB6, SACTG and SPB74  
 Dataset S3 – LC-MS/MS of SACTE, S2a protein report, S2b peptide report  
 Dataset S4 – LC-MS/MS of SDPB6, S2a protein report, S2b peptide report  
 Dataset S5 – RNAseq DEseq ActE  
 Dataset S6 – RNAseq DEseq SDPB6  
 Dataset S7 – KEGG and CAZy DE analysis

Table S1 – RNA-Seq statistics

| Strain | Growth Condition | Sample ID | Total Reads | Mapped Reads | % Mapped | % 16S rRNA | % 23S rRNA | Genome Coverage (reads per CDS) |
|--------|------------------|-----------|-------------|--------------|----------|------------|------------|---------------------------------|
| SACTE  | Glucose          | AB-70     | 15154581    | 7954329      | 52%      | 0.2%       | 2.7%       | 1197                            |
|        |                  | AB-32     | 16291889    | 10289877     | 63%      | 0.2%       | 2.3%       | 1548                            |
|        |                  | AB-18     | 8213541     | 4849260      | 59%      | 1.5%       | 3.5%       | 730                             |
|        | AFEX-CS          | AB-39     | 7777610     | 3273638      | 42%      | 0.2%       | 0.9%       | 492                             |
|        |                  | AB-57     | 21935958    | 13832930     | 63%      | 0.1%       | 0.5%       | 2081                            |
|        |                  | AB-44     | 11087724    | 4933583      | 44%      | 0.2%       | 1.1%       | 742                             |
| SDPB6  | Glucose          | AB-58     | 26068114    | 10134764     | 39%      | 0.1%       | 0.0%       | 1593                            |
|        |                  | AB-35     | 17600584    | 5195048      | 30%      | 0.5%       | 0.2%       | 817                             |
|        |                  | AB-60     | 17661709    | 5757524      | 33%      | 0.2%       | 0.1%       | 905                             |
|        | AFEX-CS          | AB-26     | 11205491    | 3246117      | 29%      | 52.6%      | 10.3%      | 510                             |
|        |                  | AB-29     | 18020392    | 4908959      | 27%      | 0.7%       | 0.7%       | 772                             |
|        |                  | AB-27     | 11538238    | 4930499      | 43%      | 0.7%       | 0.7%       | 775                             |

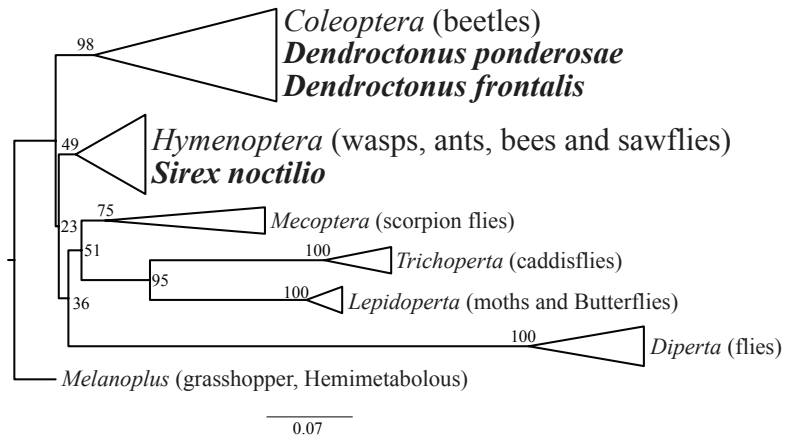

FIG S1. 18S phylogenetic tree of select holometabolous insect phyla. The maximum likelihood tree was generated from an alignment containing greater than three species per phyla and the hemimetabolous outgroup. Phyla clades were collapsed for clarity. Bootstrap support for the maximum-likelihood analysis is given at each node.

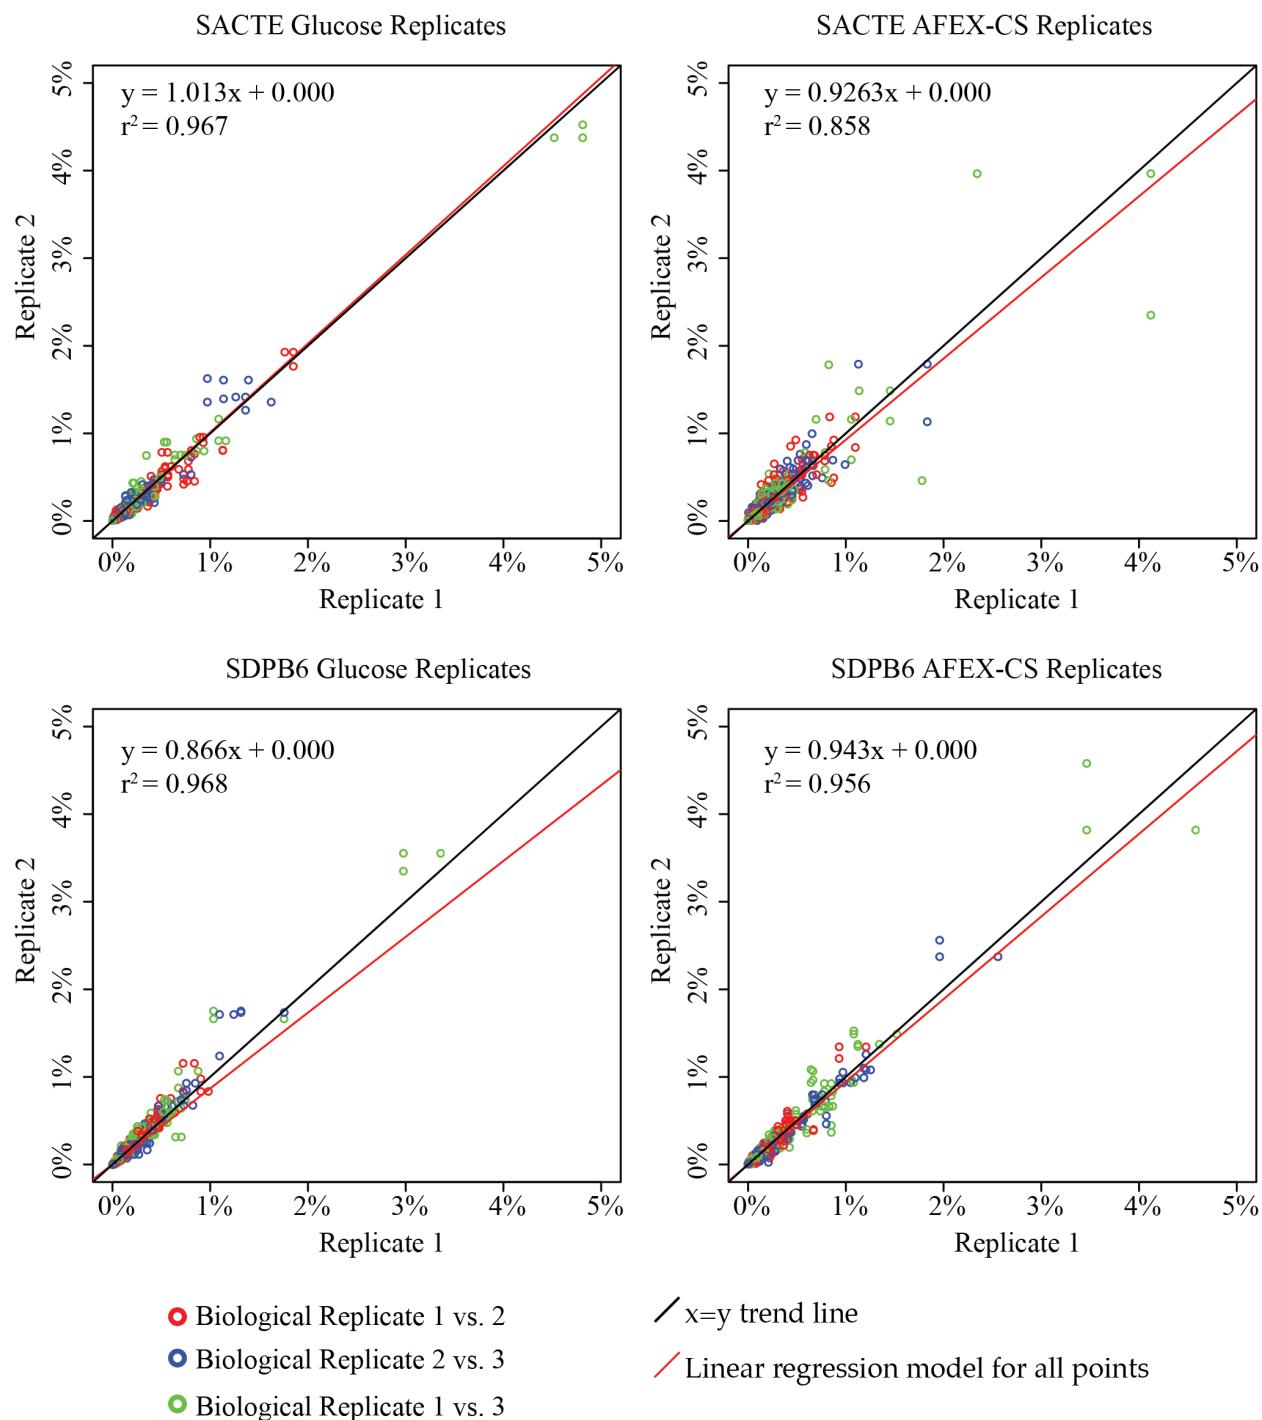

FIG S2. Pairwise comparison of normalized read counts for all protein coding genes between biological replicates. Read counts were normalized by dividing the number of reads for each gene by the total reads for that biological replicate. Red circles represent replicate 1 versus replicate 2; blue, replicate 2 versus replicate 3; green, replicate 1 versus replicate 3. Black line indicates  $y=x$ , the theoretical line for perfect match between replicates. The red line indicates the linear regression model for all points, the model equation is provided along with the  $r^2$  value.
